# Supplementary material
Source: PubMed Central journal article supplement (PMC8291741)
Supplement: NIHMS1653273-supplement-1.pdf [file NIHMS1653273-supplement-1.pdf]

**Supplemental Table 1.** Forward and reverse oligonucleotide primer sequences

| <b>Gene</b>  | <b>Primer 1</b>                | <b>Primer 2</b>               |
|--------------|--------------------------------|-------------------------------|
| <i>GREM1</i> | 5'-TTTTGCACCAGTCTCGCTT-3'      | 5'-GCCGCACTGACAGTATGAG-3'     |
| <i>HAS2</i>  | 5'-CCCAACACCTCCAACCAT-3'       | 5'-GTACACAGCCTTCAGAGCAC-3'    |
| <i>PTGS2</i> | 5'-GCCATAGTCAGCATTGTAAGTTG-3'  | 5'-GCACTACATACTTACCCACTTCA-3' |
| <i>VCAN</i>  | 5'-TAAAGGGATGATTGGTGTAGTTCT-3' | 5'-CAGATTTGATGCCTACTGCTT-3'   |
| <i>GAPDH</i> | 5'-TGTAGTTGAGGTCAATGAAGGG-3'   | 5'-ACATCGCTCAGACACCATG-3'     |
